# Supplementary material
Source: PubMed Central journal article supplement (PMC9017300)
Supplement: jb.00479-21-s0004.pdf [file jb.00479-21-s0004.pdf]

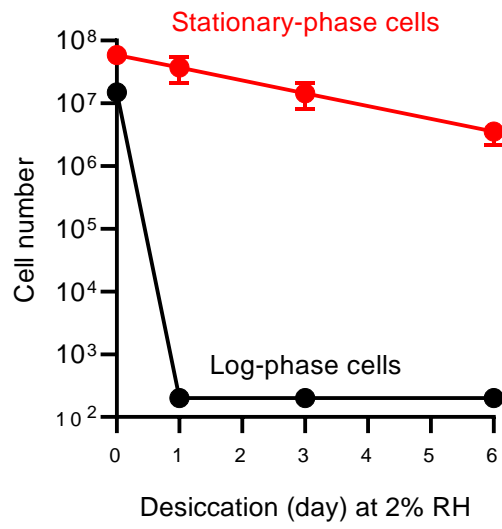

**FIG S1** Desiccation tolerance of *A. baumannii* AB5075 cells from the log- and stationary-phases of growth. The cell number represents the total number of viable cells recovered from each membrane. The data are the averages of three biological replicates, and standard deviations are shown as error bars. The detection limit is 200 cells.

(A)

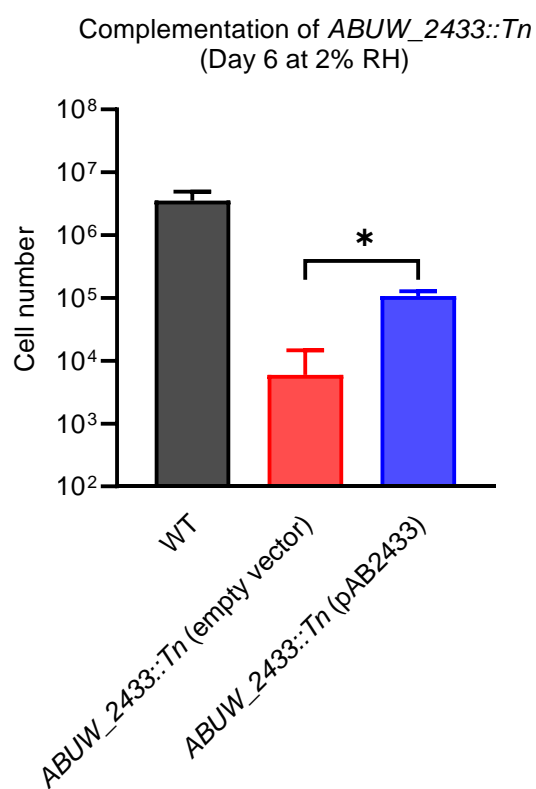

(B)

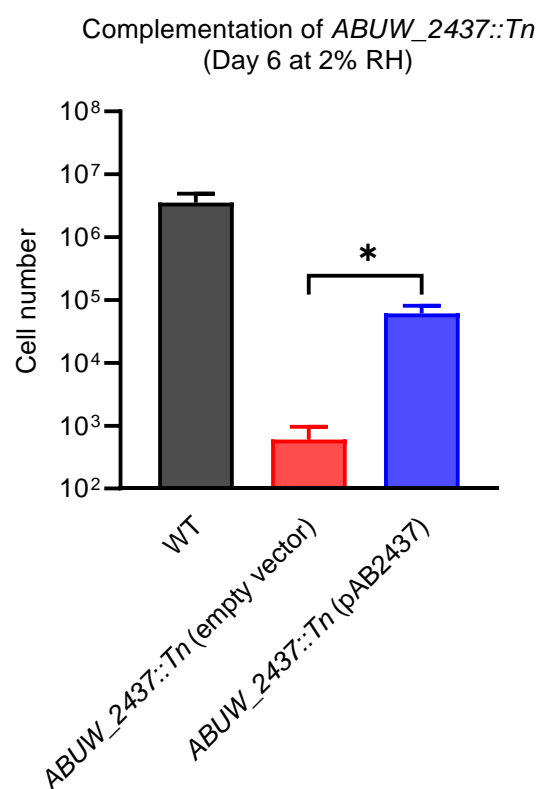

**FIG S2** Complementation of desiccation phenotypes of (A) *ABUW\_2433::Tn* and (B) *ABUW\_2437::Tn* after 6 days of desiccation at 2% RH. Empty vector was used as a control. The data are the average of three biological replicates, and standard deviations are shown as error bars. Statistical significance was calculated using a t-test: \*  $P < 0.05$ . The detection limit is 200 cells.
